# Supplementary material for: Visual and dual-fluorescence homogeneous sensor for the detection of pyrophosphatase in clinical hyperthyroidism samples based on selective recognition of CdTe QDs and coordination polymerization of Ce3+
Source: Royal Society of Chemistry journal article supplement (doi:10.1039/d1tc00558h), 2021-01-01
Supplement: d1tc00558h1.pdf [file d1tc00558h1.pdf]

## Electronic Supplementary Information

### **Visual and dual-fluorescence homogeneous sensor for detection of pyrophosphatase in clinical hyperthyroidism samples based on selective recognition of CdTe QDs and coordination polymerization of Ce<sup>3+</sup>**

Piaopiao Chen,<sup>a</sup> Runlian Qu,<sup>a</sup> Wu Peng,<sup>a</sup> Xiu Wang,<sup>b</sup> Ke Huang,<sup>b</sup> Yaqin He,<sup>a</sup> Xialin Zhang,<sup>c</sup> Yanming Meng,<sup>a</sup> Tangyuheng Liu,<sup>a</sup> Jie Chen,<sup>a</sup> Yi Xie,<sup>a</sup> Jin Huang,<sup>a</sup> Qian Hu,<sup>\*d</sup> Jia Geng,<sup>\*a</sup> and Binwu Ying<sup>\*a</sup>

<sup>a</sup> Department of Laboratory Medicine, State Key Laboratory of Biotherapy and Cancer Center, Med+X Center for Manufacturing, West China Precision Medicine Industrial Technology Institute, West China Hospital, Sichuan University and Collaborative Innovation Center for Biotherapy, Chengdu, Sichuan, 610041, China.

<sup>b</sup> College of Chemistry and Material Science, Sichuan Normal University, Chengdu, Sichuan, 610068, China

<sup>c</sup> Interdisciplinary Nanoscience Center, Aarhus University, Aarhus C, 8000, Denmark

<sup>d</sup> Laboratory of Molecular Translational Medicine, Centre for Translational Medicine, Key Laboratory of Birth Defects and Related Diseases of Women and Children (Sichuan University), Ministry of Education, Clinical Research Center for Birth Defects of Sichuan Province, West China Second University Hospital, Sichuan University, Chengdu, Sichuan 610041, China. yyfhtt113student@163.com.

\*Corresponding authors. E-mails: yyfhtt113student@163.com; geng.jia@scu.edu.cn; yingbinwu@scu.edu.cn.

## Materials and reagents.

All reagents used in this work were of analytical-reagent or higher grade and used without further purification. Pyrophosphatase (PPase, inorganic, from yeast), human serum albumin (HSA), lysozyme, transferrin, papain,  $\alpha$ -L-fucosidase (AFu), mucin 1, thrombin, alkaline phosphatase (ALP), and NaF were obtained from Sigma-Aldrich Co., Ltd. (China). Mono-potassium phosphate ( $\text{KH}_2\text{PO}_4$ ), dipotassium phosphate ( $\text{K}_2\text{HPO}_4$ ), and potassium phosphate ( $\text{K}_3\text{PO}_4$ ), were obtained from Sigma-Aldrich Co., Ltd. (China). Sodium pyrophosphate, cerium nitrate hexahydrate ( $\text{Ce}(\text{NO}_3)_3 \cdot 6\text{H}_2\text{O}$ ),  $\text{MgCl}_2$ ,  $\text{KCl}$ ,  $\text{NaCl}$ ,  $\text{CaCl}_2$ ,  $\text{CoCl}_2$ ,  $\text{MnCl}_2$ , 1 M Tris-HCl solution (pH 7.4, sterile), and  $\text{CuCl}_2$  used in this work were obtained from Shanghai Sangon Biological Engineering Technology and Services Co., Ltd. (China). Cadmium chloride ( $\text{CdCl}_2 \cdot 2.5\text{H}_2\text{O}$ ), sodium tellurite ( $\text{Na}_2\text{TeO}_3$ ), and potassium borohydride ( $\text{KBH}_4$ ) were purchased from Kelong Chemical Reagents (Chengdu, China). 3-mercaptopropionic acid (MPA),  $\text{FeCl}_2$ ,  $\text{FeCl}_3$ ,  $\text{AlCl}_3$ ,  $\text{NaNO}_3^-$ ,  $\text{K}_2\text{Cr}_2\text{O}_7$ ,  $\text{KMnO}_4$ , and  $\text{MnSO}_4$  were obtained from Aladdin Reagent Co., Ltd (Shanghai, China). Human serum samples were donated from the West China Hospital of Sichuan University (Chengdu, China, approval number: 20191045). All solutions were stored at 4 °C in a refrigerator until use.

## Instruments.

The absorption and fluorescence spectrum of CdTe QDs and PPI-Ce CPNs were recorded by the Duetta Spectrophotometer (HORIBA Canada Inc). High-resolution

transmission electron microscope (HR-TEM) measurements of CdTe QDs, Cu<sup>2+</sup> + QDs, PPI-Cu<sup>2+</sup>-PPI + QDs, PPI-Ce CPNs were carried out by a Tecnai G2F20 STWIN TEM at an accelerating voltage of 200 kV (FEI Co., USA). Fourier transform infrared spectra (FTIR) of CdTe QDs were collected using a Nicolet IS10 FTIR spectrometer (Thermo Inc., America).

### **Synthesis of CdTe QDs.**

The CdTe QDs were synthesised referring to the previously reported method.<sup>1-3</sup> Firstly, a 50 mL solution containing CdCl<sub>2</sub> (0.5 mmol) and trisodium citrate (0.2 g) was prepared. Then, MPA (52 μL) was instantly added into the above solution, and the solution pH was adjusted to 10.5 with NaOH. Later, Na<sub>2</sub>TeO<sub>3</sub> (0.1 mmol) and KBH<sub>4</sub> (50 mg) were added into the above solution, and refluxed 1 h to obtain the CdTe QDs. Subsequently, high purity CdTe QDs was obtained via precipitating withn-propanol and centrifuging (11000 rpm). The purified red CdTe QDs were redispersed in high purity water before to use.

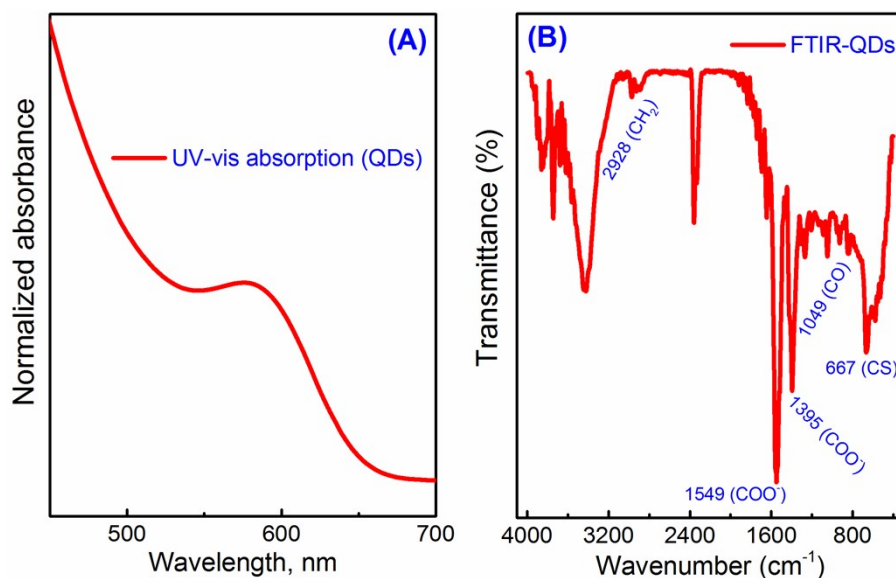

**Fig. S1** Characterization of QDs by UV-Vis absorption (A), and Fourier transform infrared spectra (B).

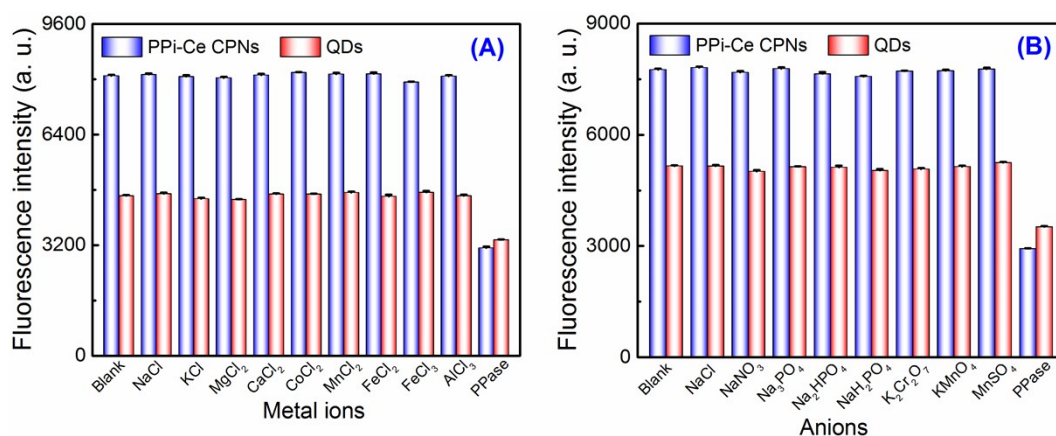

**Fig. S2** The potential interference of metal ions (A), and anions (B) on the detection of PPase with PPI-Ce CPNs and CdTe QDs as signal molecules, respectively.  $\text{Na}^+$  (100 mM),  $\text{K}^+$  (10 mM),  $\text{Mg}^{2+}$  (10 mM),  $\text{Ca}^{2+}$  (25  $\mu\text{M}$ ),  $\text{Co}^{2+}$  (25  $\mu\text{M}$ ),  $\text{Mn}^{2+}$  (25  $\mu\text{M}$ ),  $\text{Fe}^{2+}$  (25  $\mu\text{M}$ ),  $\text{Fe}^{3+}$  (25  $\mu\text{M}$ ), and  $\text{Al}^{3+}$  (25  $\mu\text{M}$ ); and 100  $\mu\text{M}$   $\text{Cl}^-$ ,  $\text{NO}_3^-$ ,  $\text{PO}_4^{3-}$ ,  $\text{HPO}_4^{2-}$ ,  $\text{H}_2\text{PO}_4^-$ ,  $\text{Cr}_2\text{O}_7^{2-}$ ,  $\text{MnO}_4^-$ , and  $\text{SO}_4^{2-}$ . Error bars were estimated from three replicate measurements.

## References

- 1 P. P. Chen, Y. J. Bai, Y. Tang, S. X. Yan, X. Y. Wang, W. R. Wei, J. Wang, M. Zhang, B. W. Ying and J. Geng, *J. Mater. Chem. B*, 2020, **8**, 7677-7684.
- 2 P. P. Chen, X. Jiang, K. Huang, P. Y. Hu, X. Q. Li, L. Wei, W. Z. Liu, L. W. Wei, C. M. Tao, B. W. Ying, X. W. Wei and J. Geng, *ACS Appl. Mater. Interfaces*, 2019,

**11**, 36476-36484.

3 P. Y. Hu, X. Wang, L. Wei, R. Dai, X. Yuan, K. Huang and P. P. Chen, *J. Mater. Chem. B*, 2019, **7**, 4778-4783.
